# Supplementary material for: Prediction of Altered 3′- UTR miRNA-Binding Sites from RNA-Seq Data: The Swine Leukocyte Antigen Complex (SLA) as a Model Region
Source: PLoS One. 2012 Nov 6;7(11):e48607. doi: 10.1371/journal.pone.0048607 (PMC3490867; doi:10.1371/journal.pone.0048607)
Supplement: Table S4 — List of created and disrupted miRNA target sites in the SLA region predicted from RNA-Seq data. Target sites conserved in humans are marked by #. Target sites with perturbed but not disrupted structure are designated by (s). (XLSX) [file pone.0048607.s005.xlsx]

## Sheet: Feuil1
Target sites conserved in humans are marked by #. Target sites with perturbed but not disrupted structure are designated by §.
VEGA accession ID	Gene symbol	UTR length	Ref/Var	Strand	Position in UTR	Created miRNA target sites			Disrupted miRNA target sites
			Or dbSNP/Illumina 60K SNP			Targetscan	PACMIT	TargetSpy	Targetscan	PACMIT	TargetSpy
			chip Accession Number
OTTSUSG00000000169	SLA-DQB1	358	G/A	-	306				ssc-miR-139-5p#
OTTSUSG00000000171	SLA-DQA	652	A/T	+	195	ssc-miR-148a	ssc-miR-148a		ssc-miR-339-3p
						ssc-miR-148b	ssc-miR-148b
						ssc-miR-152	ssc-miR-152
						ssc-miR-500	ssc-miR-500
OTTSUSG00000000171	SLA-DQA	652	G/A	+	562	ssc-miR-130a	ssc-miR-130a
						ssc-miR-130b	ssc-miR-130b
OTTSUSG00000000183	HSPA1A	422	A/G	+	195			ssc-miR-455		ssc-miR-148a	ssc-miR-148a
										ssc-miR-148b
										ssc-miR-152
										ssc-miR-4336
OTTSUSG00000000183	HSPA1A	422	C/T	+	109	ssc-miR-101	ssc-miR-101§
OTTSUSG00000000207	CYP21A2	529	T/A	+	362	ssc-miR-545
OTTSUSG00000000225	PBX2	1629	G/A	-	1014	ssc-miR-105	ssc-miR-105
						ssc-miR-103
						ssc-miR-107
OTTSUSG00000000304	DDR1	874	A/C	+	355	ssc-miR-1296#				ssc-miR-199a§
										ssc-miR-199b§
OTTSUSG00000000334	SLA-1	418	G/C	+	287	ssc-miR-34a	ssc-miR-34a				ssc-miR-34c
						ssc-miR-34c	ssc-miR-34c
OTTSUSG00000000334	SLA-1	418	A/T,G	+	250			ssc-miR-505			ssc-miR-2320
OTTSUSG00000000395	PPP1R10	1099	G/A	-	886			ssc-miR-376a
OTTSUSG00000000396	ABCF1	559	G/A	+	136	ssc-miR-34a	ssc-miR-34a		ssc-miR-885-3p	ssc-miR-885-3p
						ssc-miR-34c	ssc-miR-34c
OTTSUSG00000000232	CREBL1	458	A/G	-	106		ssc-miR-339-5p
							ssc-miR-4334-3p
OTTSUSG00000000436	SBAB-1051H9.6	874	CA-CCA	-	499		ssc-miR-296
OTTSUSG00000000392	MRPS18B	276	T/C	+	136					ssc-miR-17-3p
OTTSUSG00000000189	TAP1	417	C/T	+	336					ssc-miR-204
OTTSUSG00000000321	TRIM26	1455	A/G	-	255	ssc-miR-34a	ssc-miR-34a		ssc-miR-196a	ssc-miR-196a
						ssc-miR-34c	ssc-miR-34c		ssc-miR-196b-5p	ssc-miR-196b-5p
									ssc-miR-1296
OTTSUSG00000000173	SLA-DOB	437	C/T	-	118	ssc-miR-1306-5p	ssc-miR-1306-5p	ssc-miR-425-5p			ssc-miR-219
OTTSUSG00000000173	SLA-DOB	437	T/C	-	104				ssc-miR-490		ssc-miR-2476
OTTSUSG00000000266	SLA-6	279	A/C	-	58			ssc-miR-181a
OTTSUSG00000000170	SLA-DRA	1360	rs55618951					ssc-miR-224	ssc-miR-202	ssc-miR-202	ssc-miR-181c
								ssc-miR-125a
OTTSUSG00000000231	RNF5	489	rs10720561			ssc-miR-9	ssc-miR-9	ssc-miR-323
						ssc-miR-133a-3p	ssc-miR-133b
						ssc-miR-133b
OTTSUSG00000000231	RNF5	489	MARC0089437			ssc-miR-423-5p#
OTTSUSG00000000179	SLA-DOA	1139	M1GA0009826				ssc-miR-101§	ssc-miR-101
