# Supplementary material for: Prediction of Altered 3′- UTR miRNA-Binding Sites from RNA-Seq Data: The Swine Leukocyte Antigen Complex (SLA) as a Model Region
Source: PLoS One. 2012 Nov 6;7(11):e48607. doi: 10.1371/journal.pone.0048607 (PMC3490867; doi:10.1371/journal.pone.0048607)
Supplement: Table S5 — Number of reads corresponding to the reference and the variant alleles at poly-miRTSs positions in abdominal fat, liver and longissimus dorsi muscle. (XLSX) [file pone.0048607.s006.xlsx]

## Sheet: Feuil1
Individual 2268
		Abdominal fat		Liver		Longissimus dorsi
	Position in UTR	# reads with the reference allele	# reads with the variant allele	# reads with the reference allele	# reads with the variant allele	# reads with the reference allele	# reads with the variant allele	Targeting miRNAs
SLA-1	287	678	97	712	338	54	28	ssc-miR-34c ssc-miR-34a
SLA-1	250	42	568	129	463	7	13	ssc-miR-505 ssc-miR-2320
RNF5	261	126	145	169	193	97	88	ssc-miR-9 ssc-miR-133b ssc-miR-133a-3p ssc-miR-323
Individual 2270
		Abdominal fat		Liver		Longissimus dorsi
	Position in UTR	# reads with the reference allele	# reads with the variant allele	# reads with the reference allele	# reads with the variant allele	# reads with the reference allele	# reads with the variant allele	Targeting miRNAs
HSPA1A	195	37	41	46	73	78	111	ssc-miR-148a ssc-miR-148b ssc-miR-152 ssc-miR-4336 ssc-miR-455
